# Supplementary material for: Rapid identification of new bacterial alcohol dehydrogenases for (R)- and (S)-enantioselective reduction of ß-ketoesters
Source: Royal Society of Chemistry journal article supplement (doi:10.1039/b407004f), 2004-01-01
Supplement: b407004f.doc [file b407004f.doc]

***# Supplementary Material (ESI) for Chemical Communications***

***# This journal is © The Royal Society of Chemistry 2004***

***Supplementary information:***

**Rapid identification of new bacterial alcohol dehydrogenases for**

**(R)- and (S)-enantioselective reduction of ß-ketoesters**

Jie Zhang, Wouter A. Duetz, Bernard Witholt, Zhi Li *

Institute of Biotechnology, ETH-Zurich, Honggerberg, CH-8093 Zurich, Switzerland

zhi@biotech.biol.ethz.ch

**1) General Methods**

1H and 13C NMR spectra were determined at 300 or 400 and 75 or 100 MHz, respectively, at 293K in CDCl3 with chemical shift  in ppm relative to TMS and coupling constants *J* in Hz. IR spectra were measured in CHCl3. Optical rotations were determined using a Perkin Elmer 241 polarimeter. Mass spectra were obtained by atmospheric pressure chemical ionization (APCI). Bioconversion was analyzed by GC or HPLC-MS.

**2) Analytic conditions**

*GC-analysis of ee of compound* ***2*** *for screening*, column: Lipodex-A, 25 m × 0.25 mm; temperature program: 40 oC to 120 oC at 5 oC/min, increase the temperature to 170 oC at 45 oC /min; retention time: 11.89 min for (*S*)-**2** and 12.21 min for (*R*)-**2**.

*GC-analysis of ee of compound* ***2*** *for preparative biotransformation*, column: Chirasil-Dex CB (Chrompack), 30 m × 0.25 mm; temperature program: 50 oC to 160 oC at 10 oC/min; retention time: 9.39 min for (*S*)-**2** and 9.73 min for (*R*)-**2**.

*HPLC-analysis of ee of compound* ***4*** *for screening and preparative transformation*, column: Chiralcel OB-H, 250 mm × 4.6 mm; eluent: *n*-hexane/2-propanol 75/25; flow rate: 0.5ml/min; UV detection: 210 nm; retention time: 15.6 min for (***+***)-**4** and 21.2 min for (**-**)-**4.**

*GC-analysis of conversion of* ***1*** *to* ***2***, Column: Chrompack Optima-5 column (25m × 0.32mm), temperature program: 50 oC for 10 min, increase to 280 oC at a rate of 10 oC/min, keep at 280 oC for 2 min. Retention time: 2.01 and 5.25 min for **1**, 4.16 min for **2**.

*HPLC-MS-analysis of conversion of* ***3*** *to* ***4***, Column: Nucleosil 120-5 C18, 125mm × 8mm. Eluent: acetonitrile/10mM K-phosphate Buffer (pH = 7.0), 1/9; flow rate: 0.5ml/min; UV detection: 210 nm; MS detection: APCI at 80 eV. Retention time: 3.1 min for **3**, 1.32 min for **4**.

**3) Screening protocol**

78 phenylalanine- and 84 tyrosine-degrading strains from freezer (-80oC) were parallel inoculated by use of spring-loaded replicate into the deep wells of microtiter plates containing ½ Evens agar and 5mM phenylalanine or tyrosine. The strains were grown for 2 weeks and inoculated parallel by use of spring-loaded replicate into the deep-wells of microtiter plates containing 1 ml 1/2 Evans liquid medium and 5 mM phenylalanine or tyrosine. After growth at 25oC and 300 rpm for 3 days, cells were parallel harvested by centrifugation and resuspensed into the microtiter deep-wells containing 550 l 50mM potassium phosphate-buffer (PH= 8.0) and 2 mM substrate **1** or **3**. After reaction at 25oC and 300 rpm for 2 h, the cells were removed by centrifugation, and the supernatant (450 l) was parallel extracted with CHCl3 (450 l) in the deep-wells. The organic phase was dried over Na2SO4, filtrated, and the samples were used for the ee determination by GC or HPLC on a chiral column with an auto-sampler.

Component of ½ Evens liquid medium (1 L):

NH4Cl 2.67 g

Na2SO4 0.142 g

NTA((HOOCCH2)3N) 0.382 g

MgCl2 0.06 g

CaCl2 1.11 mg

(NH4)8MoO24 0.015 mg

K2HPO4 17.4 g

ZnO 2.04 mg

FeCl3 6H2O 27.0 mg

MnCl2 4H2O 10.0 mg

CuCl2 2H2O 0.85 mg

CoCl2 6H2O 2.38 mg

H3BO3 0.31 mg

H2O till 1 L

HCl and NaOH adjusting the pH to 7.0

**4) Growth of *Klebsiella pneumomiae* Phe-E4, *Bacillus pumilus* Phe-C3, *Pseudomonas* sp. Tyr-F10, and *Acinetobacter* sp. Tyr-B12**

Four strains, Phe-E4, Phe-C3, Tyr-F10 and Tyr-B12 were identified by DSMZ as *Klebsiella pneumomiae*, *Bacillus pumilus*, *Pseudomonas* sp., and *Acinetobacter* sp., respectively. They were grown on ½ Evans agar plate containing 5 mM tyrosine or phenylalanine and then inoculated in 35 ml 1/2 Evans medium containing 2% glucose and 5 mM phenylalanine or tyrosine in a shaking flask, respectively. The cells were grown at 25oC and 300 rpm and the cell density was followed by OD450 measurement. At the late exponential phase (OD450 of 9.6 at 9 h for *K. pneumomiae* Phe-E4, OD450 of 8.6 at 36 h for *B. pumilus* Phe-C3, OD450 of 9.5 at 15 h for *Pseudomonas* sp. Tyr-F10, and OD450 of 1.5 at 18 h for *Acinetobacter* sp. Tyr-B12), the cells were harvested by centrifugation and the cell pellets were stored at -80 oC.

**5) Preparation of (*S*)-ethyl 3-hydroxy-4,4,4-trifluorobutyrate 2 by reduction of ethyl 3-keto-4,4,4-trifluorobutyrate 1 with frozen/thawed cells of *K. pneumomiae* Phe-E4**

Ethyl 3-keto-4,4,4-trifluorobutyrate **1** (644 mg, 3.5 mmol) was added to 350 ml cell suspension of strain Phe-E4 (6.0 g cwd/l) in 50 mM potassium phosphate buffer (pH = 8.0) in a 1-L shaking flask. The mixture was shaken at 25 oC and 300 rpm. The reaction was stopped at 28 h with 96% conversion by centrifugation, and the product was extracted into CHCl3. The organic phase was dried over Na2SO4, filtered, and evaporated. Purification by column chromatography on silica gel afforded 514 mg (81%) of (***S***)**-2** as colorless liquid: *Rf* 0.07 (*n*-hexane/ethyl acetate, 9:1), purity >99% (GC), 90% ee (GC), []25D = -18.1 o (*c* 1.0, CHCl3). 1H NMR (400MHz, CDCl3):  4.38 (broad *s*, 1 H, H-C(3)), 4.15 (*q*, *J* = 7.2, 2 H, OCH2), 3.50 (broad *s*, 1 H, OH), 2.69-2.57 (*m*, 2 H, HA-C(2), HB-C(2)), 1.23 (*t*, *J* = 7.2, 3 H, CH3). 13C NMR (100MHz, CDCl3)170.8 (CO); 128.6, 125.8, 123.0, 120.4 (CF3); 67.8, 67.5, 67.1, 66.9 (C-3); 61.6 (OCH2); 34.7 (C-2); 14.1 (CH3). MS: m/z 187 (M+1, 100). IR (cm-1): 3599(OH), 1730(CO).

**6) Preparation of (*R*)-ethyl 3-hydroxy-4,4,4-trifluorobutyrate 2 by reduction of ethyl 3-keto-4,4,4-trifluorobutyrate 1 with frozen/thawed cells of *B. pumilus* Phe-C3**

Ethyl 3-keto-4,4,4-trifluorobutyrate **1** (695 mg, 3.78 mmol) was added to 189 ml cell suspension (12.5 g cdw/l) of strain Phe-C3 in 50mM potassium phosphate buffer (pH = 8.0) containing glucose (2%, w/v) in a 500-ml shaking flask. The mixture was shaken at 25 oC and 300 rpm for 48 h giving 98% conversion. The cells were removed by centrifugation, and the product was extracted into CHCl3. The organic phase was dried over Na2SO4, filtered, and evaporated. Purification by column chromatography on silica gel afforded 565mg (84%) of (*R*)-**2** as colorless liquid: *Rf* 0.07 ( n-hexane/ethyl acetate = 9:1), purity >99% (GC), 90% ee (GC), []25D = +18.7 o(*c* 1.0, CHCl3). 1H NMR (400MHz, CDCl3):  4.42 (broad *s*, 1 H, H-C(3)), 4.22 (*q*, *J* = 7.2, 2 H, OCH2), 3.58 (broad *s*, 1 H, OH), 2.72-2.64 (*m*, 2 H, HA-C(2), HB-C(2)), 1.28 (*t*, *J* = 7.2, 3 H, CH3). 13C NMR (100MHz, CDCl3):  170.8 (CO); 128.6, 125.8, 123.0, 120.2 (CF3); 67.8, 67.5, 67.1, 66.8 (C-3); 61.7 (OCH2); 34.7 (C-2); 14.1 (CH3). MS: m/z 187 (M+1, 100). IR (cm-1): 3599(OH), 1730(CO).

**7) Preparation of (+)-methyl 3-hydroxyl-3-(3’-pyridyl)-propionate 4 by reduction of methyl 3-keto-3-(3’-pyridyl)-propionate 3 with frozen/ thawed cells of *Pseudomonas* sp. Tyr-F10**

Methyl 3-keto-3-(3’-pyridyl)-propionate **3** (117 mg,0.65 mmol) was added to 130 ml cell suspension (6.8 g cdw/l) of strain Tyr-F10 in 50mM potassium phosphate buffer (pH = 8.0) in a 500-mL shaking flask. The mixture was shaken at 25 oC and 300 rpm. The reaction was stopped at 9 h with 99% conversion. The cells were removed by centrifugation, and the product was extracted into chloroform. The organic phase was dried over Na2SO4, filtered, and evaporated. Purification by column chromatography on silica gel afforded 94 mg (82%) of (+)-**4** as colorless liquid: *Rf*0.16 (chloroform/methanol 15:1); purity >98% (LC-MS), 87% ee (HPLC). [] 25 D = +7.5o (c 1.0, CHCl3). 1H NMR (300MHz, CDCl3):  8.56 (*s*, 1 H, H-C(2’, Py)), 8.49 (*d*, *J* = 3.6, 1 H, H-C(6’, Py)), 7.74 (*d*, *J* = 7.2, 1 H, H-C(4’, Py)), 7.28 (*dd*, *J* = 3.6, 7.2, 1 H, H-C(5’, Py)), 5.18 (*dd*, *J* = 4.4, 8.8, 1 H, H-C(3)), 3.71 (*s*, 3H, OCH3), 2.76 (*dd*, *J* = 4.4, 16.2, 1 H, HA-C(2)), 2.74 (*dd*, *J* = 8.8, 16.2, 1 H, HB-C(2)). 13C NMR (75MHz, CDCl3):  172.2 (CO); 148.9 (C(6’, Py)); 147.4 (C(2’, Py)); 138.0 (C(3’, Py)); 133.5 (C(4’, Py)); 123.5 (C(5’,Py)); 68.1 (C(3)); 52.1 (OCH3); 43.0 (C(2)). MS: m/z 182 (M+1, 100), 164 (M-H2O, 40). IR (cm–1): 3198(OH); 1733(CO); 1596, 1581, 1436 (C=C, C=N).

**8) Preparation of (-)-methyl 3-hydroxy-3-(3’-pyridyl)-propionate 4 by reduction of methyl 3-keto-3-(3’-pyridyl)-propionate 3 with frozen/thawed cells of *Acinetobacter* sp. Tyr-B12**

Methyl 3-keto-3-(3’-pyridyl)-propionate **3 (**162 mg, 0.91 mmol) was added to 60 ml cell suspension (4.5 g cdw/l) of strain Tyr-B12 in 50mM potassium phosphate buffer (pH = 8.0) in a 500-mL shaking flask. The mixture was shaken at 25 oC and 300 rpm, and the reaction was stopped at 9 h with 96% conversion. The cells were removed by centrifugation, and the product was extracted into chloroform. The organic phase was dried over Na2SO4, filtered, and evaporated. Purification by column chromatography on silica gel afforded 138 mg (87%) of (-)**-4** as colorless liquid: *Rf* 0.16 (chloroform/methanol = 15:1), purity >98% (HPLC), 98% ee (HPLC). [α] 25 D= - 8.2 o (*c* 1.0, CHCl3). 1H NMR (300MHz, CDCl3):  8.60 (*s*, 1 H, H-C(2’, Py)), 8.53 (*d*, *J* = 3.6, 1 H, H-C(6’, Py)), 7.76 (*d*, *J* = 7.2, 1 H, H-C(4’, Py)), 7.25 (*dd*, *J* = 3.6, 7.2, 1 H, H-C(5’, Py)), 5.20 (*dd*, *J* = 4.4, 8.8, 1 H, H-C(3)), 3.74 (*s*, 3 H, OCH3), 2.76 (*dd*, *J* = 4.4, 16.2, 1 H, HA-C(2)), 2.72 (*dd*, *J* = 8.8, 16.2, 1 H, HB-C(2)), 1.78 (broad *s*, 1 H, OH). 13C NMR (75MHz, CDCl3):  172.2 (CO); 148.9 (C(6’, Py)); 147.4 (C(2’, Py)); 138.0 (C(3’, Py)); 133.5 (C(4’, Py)); 123.5 (C(5’,Py)); 68.1 (C(3)); 52.1 (OCH3); 43.0 (C(2)). MS: m/z 182 (M+1, 100), 164 (M-H2O, 40). IR (cm–1): 3198 (OH); 1731 (CO); 1595, 1581, 1435 (C=C, C=N).
